# Supplementary material for: Resource utilization of oak fruit peel as biomass waste for the synthesis of carbon with graphene oxide-like composition and its composite with Mg1−xCaxFe2O4for Cd(ii) removal from water: characterization, magnetic properties, and potential adsorption study
Source: Royal Society of Chemistry journal article supplement (doi:10.1039/d4ew00059e), 2024-01-01
Supplement: d4ew00059e1.pdf [file d4ew00059e1.pdf]

## Supplementary Information

### **Resource usage of biomass waste as oak fruit peel to synthesize carbon with graphene oxide-like composition and composite with $\text{Mg}_{1-x}\text{Ca}_x\text{Fe}_2\text{O}_4$ in removing Cd (II) from water: characterization, magnetic properties, and potential adsorption study**

Younes Zohrabi<sup>a</sup>, Mohammad Ebrahim Ghazi <sup>\*a</sup>, Morteza Izadifard<sup>a</sup>, Alireza Valipour<sup>\*b</sup> and Sivasankaran Ayyaru<sup>\*c</sup>

<sup>a</sup> *Department of Physics, Shahrood University of Technology, Shahrood, Iran.*

<sup>b</sup> *Water and Wastewater Research Center (WWRC), Water Research Institute (WRI), Shahid Abbaspour Blvd., Tehran, 16765 313, Iran.*

<sup>c</sup> *Department of Bioengineering, Saveetha School of Engineering, Saveetha Institute of Medical and Technical Sciences, Chennai, 602105, India.*

\*Corresponding authors:

E-mail: [alirezavalipour.envi@gmail.com](mailto:alirezavalipour.envi@gmail.com) (A. Valipour)

Tel.: +98 21 77000919

[mghazi@shahroodut.ac.ir](mailto:mghazi@shahroodut.ac.ir) (M.E.Ghazi)

Tel.: +98 23 32395270

[sivasankaran2010@gmail.com](mailto:sivasankaran2010@gmail.com) (S. Ayyaru)

Tel.: +91 9790025383

## Materials and Methods

### Materials

The oak fruit peel (OFP) was collected from Zagros Mountains in the west of Iran. Standard graphite (99.9%) was obtained from Kanto Chemical Co. Inc., Japan. Hydrogen peroxide ( $\text{H}_2\text{O}_2$ , 30%), sulfuric acid ( $\text{H}_2\text{SO}_4$ , 95%), phosphoric acid ( $\text{H}_3\text{PO}_4$ , 85%), hydrochloric acid (HCl, 37%), Hydrofluoric acid (HF, 48%), potassium permanganate ( $\text{KMnO}_4$ , >99%), iron nitrate ( $\text{Fe}(\text{NO}_3)_3 \cdot 9\text{H}_2\text{O}$ ), magnesium nitrate ( $\text{Mg}(\text{NO}_3)_2 \cdot 6\text{H}_2\text{O}$ ), calcium nitrate ( $\text{Ca}(\text{NO}_3)_2 \cdot 4\text{H}_2\text{O}$ ), citric acid ( $\text{C}_6\text{H}_8\text{O}_7 \cdot \text{H}_2\text{O}$ ), nitric acid ( $\text{HNO}_3$ ), and metals (Cd, Pb, Co, Ni) standard solutions (1000 mg/L) were purchased from Merck, Germany. Sodium hydroxide (NaOH) was acquired from Sigma-Aldrich Chemical, USA. All chemicals were of analytical grade with the highest purity (>99%).

### Preparation of carbon with graphite-like composition

The carbon with graphite-like composition ( $\text{C}_G$ ) was prepared from OFP by carbonization. First, 50 g of OFP was successively cut into small pieces, washed using ultrapure water (UPW), sun-dried for 10 h, and finally completely dried in an oven at 80 °C for 12 h. After that, the OFPs were carbonized in the presence of atmospheric air in a muffle furnace at 400°C ( $\text{C}_{G400}$ ), 500°C ( $\text{C}_{G500}$ ), and 550°C ( $\text{C}_{G550}$ ) for 3 h. The obtained powder was then rinsed three times with UPW and dehydrated in an oven at 70°C for 3 h to obtain  $\text{C}_G$ . For desilication, 10 g of reasonable  $\text{C}_G$  sample (i.e.  $\text{C}_{G550}$ ) was dissolved in 30 ml of HF and stirred at 50 °C for 3 h. The resultant was then collected by centrifugation, washed several times with UPW to raise pH to neutral, and dried at 80 °C for 12 h (termed as  $\text{C}_{G550D}$ ). The energy used to prepare  $\text{C}_G$  sample is determined using Eq. (1).

$$Q = (ET)/3.6 \quad (1)$$

Where Q represents the energy utilized (MJ), E represents the power of the oven/furnace (kW), and T indicates the duration of heat.

### **Preparation of carbon with graphene oxide-like composition**

Carbon with graphene oxide-like composition ( $C_{GO}$ ) was fabricated from as-prepared  $C_G$  (i.e.  $C_{G550D}$ ) using a simple room temperature method.<sup>1</sup> In detail, 320 ml of  $H_2SO_4$  and 80 ml of  $H_3PO_4$  were mixed successively with 3 g of  $C_{G550D}$  under magnetic stirring. 18 g of  $KMnO_4$  was then slowly added over a period of 10 h. After that, the mixing procedure was extended for 5 more days to permit the oxidation of  $C_{G550D}$ . Next, 60 ml of  $H_2O_2$  (dropwise) was added to the solution to terminate the reaction, causing a color change from black to light brown. The resulting mixture was centrifuged and the resultant was washed with 1M HCl for 3 times and UPW several times to raise pH to neutral. The final product was dried in an oven at 70°C for 12h.

### **Synthesis of Ca-substituted $MgFe_2O_4$**

The details of the preparation and characterization of  $Mg_{1-x}Ca_xFe_2O_4$  (MCF) nanomaterials can be found in a previous publication.<sup>2</sup> Briefly,  $Mg_{1-x}Ca_xFe_2O_4$  with x values of 0.2 (MCF2) and 0.8 (MCF8) were fabricated by sol-gel method. The metal nitrates (i.e.  $Fe(NO_3)_3 \cdot 9H_2O$ ,  $Mg(NO_3)_2 \cdot 6H_2O$ ,  $Ca(NO_3)_2 \cdot 4H_2O$ ) and  $C_6H_8O_7 \cdot H_2O$  in the ratio of 1:1 were weighted and mixed with an appropriate volume of UPW. The mixture was stirred at 360 rpm for 3 h at 50°C. Then, the heating process was continued for more than 2 h at 80°C to obtain a dark brown powder. The resultant was annealed in a Heraeus M110 muffle furnace (Heraeus Holding GmbH, Hanau, Germany) at 1000 °C for 4 h to obtain a pure phase of MCF.

### **Fabrication of C<sub>GO</sub>/MCF nanocomposites**

The C<sub>GO</sub>/MCF nanocomposites were prepared using a one-step hydrothermal method. Briefly, 30 mg of C<sub>GO</sub> was sonicated (Elma E 30H Elmasonic, Germany) for 2 h in 20 ml of UPW to obtain a homogenous carbon solution. Next, 30 mg of MCF nanomaterials was dissolved in 20 ml of UPW and sonicated for 2 h. After that, the carbon solution was gradually added to the MCF solution. The mixture was then kept in a shaker (IKA-KS 130 basic, Germany) at ambient temperature at 400 rpm for 3 h. The resulting mixture was transferred to a 50 ml hydrothermal reactor at 150 °C for 3 h. After cooling naturally to ambient temperature, the resultant was collected by centrifugation, rinsed with UPW for several times, and dried in an oven at 70 °C for 12 h. Fig. S1 presents a schematic flow sheet for the synthesis of C<sub>GO</sub> from OFP waste, MCF nanomaterials, and C<sub>GO</sub>/MCF nanocomposites.

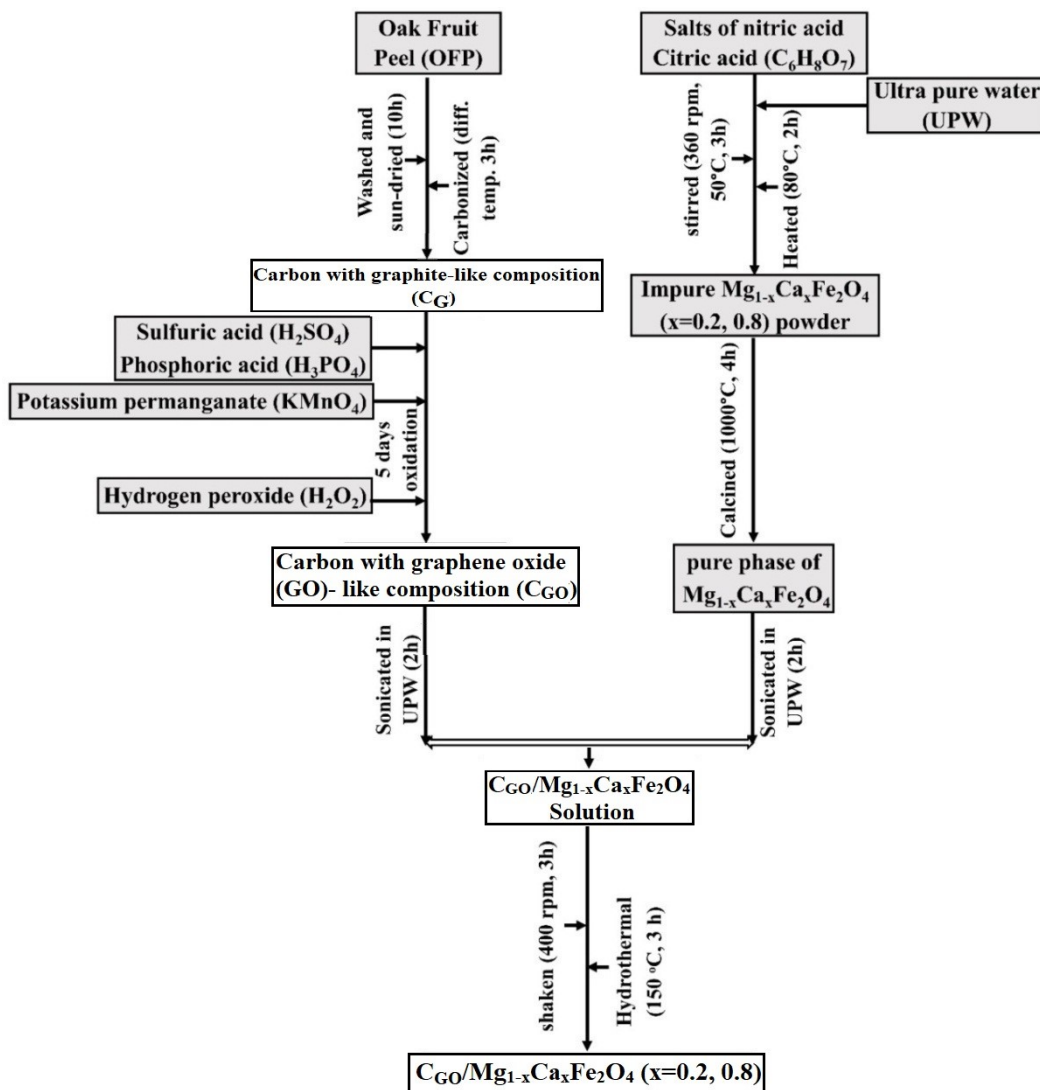

Fig. S1 Schematic diagram for the synthesis of C<sub>GO</sub> from OFP waste, MCF nanomaterials, and C<sub>GO</sub>/MCF nanocomposites.

## Characterization

The C<sub>GO</sub> and C<sub>GO</sub>/MCF nanocomposites were characterized by X-ray diffraction patterns (XRD) (Rigaku, model Ultima IV, Cu K-alpha: 1.5418 Å, Japan), Raman Spectroscopy (RS) (TakRam N1-541, Teksan Co, Iran) with laser exiting at 532 nm, Fourier-transform infrared spectroscopy (FTIR) (Bruker, model Tensor 27, Germany), X-ray photoelectron spectroscopy (XPS)

(EA10, BESTEC Co., Germany) with Al K $\alpha$  (E = 1486.6 eV) radiation, field emission scanning electron microscopy (FESEM) (Zeiss Sigma 300-HV, Germany), and Transmission Electron Microscopy (TEM) (Carl Zeiss-EM10C-100Kv, Germany) at accelerating voltage 100 Kv). The specific surface area and pore size distribution were obtained utilizing a N<sub>2</sub> isothermal adsorption tester (BELsorp, model mini II, Japan) at 77 K and estimated by Brunauer–Emmett–Teller (BET) and Barrett–Joyner–Halenda (BJH) methods. The magnetic properties of as-prepared C<sub>GO</sub>/MCF nanocomposites were attained at room temperature using a Vibrating-Sample Magnetometer (VSM) (Weistron, model VSM1100, Taiwan). The surface charges of prepared C<sub>GO</sub>/MCF nanocomposites were determined by measuring the point of zero charges (pH<sub>pzc</sub>) for electrostatic attraction analysis. The pH<sub>pzc</sub> of as-prepared C<sub>GO</sub>/MCF nanocomposites was determined using the method reported by Dao et al.<sup>3</sup> Herein, 10 mg of nanocomposite was put into 20 mL NaNO<sub>3</sub> solution with a concentration of 0.1 M. The amount of different initial pH (pH<sub>initial</sub>) (from 3 to 8) was adjusted using HCl 0.1 M or NaOH 0.1 M solutions. The attained solution was shaken for 48h and then the final pH value (pH<sub>final</sub>) was measured by a pH meter (WTW, model 323, British- U.S.A). The pH<sub>pzc</sub> could be determined from the curve of  $\Delta\text{pH} = \text{pH}_{\text{final}} - \text{pH}_{\text{initial}}$  versus pH<sub>initial</sub>.

### **Experimental approach**

All adsorption experiments were performed in batches on a shaker operating at 480 rpm at ambient temperature. The aqueous solutions containing metal ions were prepared by diluting the metal stock solutions with UPW. Here, the pH value in solutions was estimated to be ~2 since the standard solutions were acidic in nature. The initial pH of the solutions was adjusted to 7 by adding NaOH (1 M) solution before mixing with the adsorbent using a pH meter (WTW, model 323, British-U.S.A). Accordingly, a set of 250 ml Erlenmeyer flasks containing 50 mL of metal

solutions were used in adsorption studies.

The adsorption capacity of  $\text{Cd}^{2+}$  by  $\text{C}_{\text{GO}}/\text{MCF}$  nanocomposites was evaluated at different contact times (1-60 min),  $\text{C}_{\text{GO}}/\text{MCF}$  nanocomposite doses (0.002-0.01 g), and initial  $\text{Cd}^{2+}$  concentrations (5 to 60 mg/L). The effects of coexisting ions, including  $\text{Pb}^{2+}$ ,  $\text{Co}^{2+}$ , and  $\text{Ni}^{2+}$ , on  $\text{Cd}^{2+}$  adsorption onto reasonable adsorbent (i.e.  $\text{C}_{\text{GO}}/\text{MCF2}$ ) were assessed at a contact time of 20 min, a  $\text{C}_{\text{GO}}/\text{MCF2}$  dose of 0.003 g, and an initial  $\text{Cd}^{2+}$  concentration of 10 mg/L. The coexisting ions were added to the solution in a composite form, each at a concentration of 10 mg/L.

Further, the  $\text{C}_{\text{GO}}/\text{MCF2}$  adsorbent was examined in real wastewater collected from a local plated metals restoration workshop (Tehran, Iran). The wastewater sample was collected in a plastic container and stored at 4 °C in the refrigerator. The sample was then utilized for the experiment without any pre-treatment on the next day. The initial analysis of the wastewater sample revealed the existence of Cd (5.7 mg/L), Pb (2 mg/L), Zn (5.1 mg/L), and Fe (50.1 mg/L) metals, and pH was obtained to be 7. Herein, the experiments were performed in two stages under the following conditions: contact time of 20 min and  $\text{C}_{\text{GO}}/\text{MCF2}$  dose of 0.003 g. First,  $\text{C}_{\text{GO}}/\text{MCF2}$  adsorbent was employed to adsorb metals in 20 ml wastewater, and subsequently, the metal removal efficiency was assessed. Second, the effluent from the first stage of the experiment (10 ml) was treated with a fresh  $\text{C}_{\text{GO}}/\text{MCF2}$  adsorbent.

The adsorbents were separated from the contaminated solutions using an external magnet. The metal ion concentrations in the solutions were assessed using a Flame Atomic Absorption Spectrometer (Varian, model AA 240FS, U.S.A). The adsorption capacity ( $q_e$ , mg/g) of Cd (II) on as-prepared  $\text{C}_{\text{GO}}/\text{MCF}$  nanocomposites was determined by the Eq. (2):<sup>4</sup>

$$q_e = \frac{(C_0 - C_e)}{m} \times V \quad (2)$$

Where  $C_0$  (mg/L) is the initial and  $C_e$  (mg/L) is the equilibrium concentration of Cd (II),  $V$  (L)

is the volume of the Cadmium solution, and m (g) is the mass of C<sub>GO</sub>/MCF nanocomposites.

All adsorption experiments were conducted in triplicate to ensure data reproducibility, and the average results have been reported. Besides, blank samples (without adsorbent) were also run in parallel during the batch experiments, and the recorded concentration at the end of each operation was taken the same as the initial one.

### Regeneration study

The adsorbent reuse investigation was carried out with 10 mL HCl (0.2 M) solution at ambient temperature.<sup>4</sup> The solution was shaken at 480 rpm for 30 min. The adsorbents were then rinsed using ultra-pure water several times until the pH was around 7, and dried at 80°C in an oven. This experiment was employed for three adsorption cycles of Cd<sup>2+</sup> onto C<sub>GO</sub>/MCF nanocomposites under our experimental conditions (contact time=20 min, pH =7, nanocomposite dosage= 0.004 g, initial Cd<sup>2+</sup> concentration= 10 mg/L, volume solution= 50 ml).

### Adsorption kinetics and isotherms

To comprehend the rate of Cd (II) adsorption onto nanocomposites, adsorption type (monolayer or multilayer), as well as its mechanism, it is required to analyze the adsorption kinetics and isotherms. The obtained adsorption data were analyzed by the pseudo-first-order (Eq. (3)) and pseudo-second-order (Eq. (4)) kinetics, the Langmuir (Eq. (5)) and Freundlich (Eq. (6)) isotherms models.<sup>4</sup>

$$\log \frac{q_e}{q_e - q_t} = \log q_e - K_1 t \quad (3)$$

$$\frac{t}{q_t} = \frac{1}{K_2 q_e^2} + \frac{1}{q_e} t \quad (4)$$

$$\frac{C_e}{q_e} = \frac{1}{K_L X_m} + \frac{C_e}{X_m} \quad (5)$$

$$\text{Log} q_e = \text{Log} K_f + \frac{1}{n} \text{Log} C_e \quad (6)$$

Where  $q_e$  (mg/g),  $q_t$  (mg/g),  $K_1$  (Lmin<sup>-1</sup>),  $K_2$  (mg. min g<sup>-1</sup>),  $C_e$ (mg/L),  $X_m$ (mg/g),  $K_L$  (Lmg<sup>-1</sup>),  $K_F$  (mg/g) and  $1/n$  represent adsorption capacity of Cd (II) at equilibrium time, adsorption capacity at t(min) time, the pseudo-first order adsorption rate constant, the pseudo-second order adsorption rate constant, the equilibrium adsorbate concentration, maximum adsorption capacity, Langmuir constant, Freundlich constant (adsorption capacity) and intensity of adsorption, respectively.  $K_1$  and  $q_e$  were calculated using the slope and intercept of Log ( $q_e - q_t$ ) vs. time curves.  $K_2$  can be derived from the intercept and slope of the  $t/q$  vs.  $t$  plot. The Langmuir isotherm (Eq. (5)) fundamentally presupposes that the adsorbent surface is homogeneous, that energy-equivalent active sites are dispersed nearly evenly. In this isotherm, the values of  $X_m$ , and  $K_L$  were determined from the slope and intercept of  $C_e/q_e$  vs.  $C_e$ . According to the Freundlich isotherm, (Eq. (6)) sorption occurs on heterogeneous surfaces. It is feasible to determine  $K_f$  and  $1/n$  from an intercept and slope of a linear plot of log ( $q_e$ ) vs. log ( $C_e$ ).<sup>3</sup> Another important factor is the separation factor of equilibrium ( $R_L$ ), which is used to assess the favorableness of the adsorption process (Eq. (7)):

$$R_L = \frac{1}{1 + C_e K_L} \quad (7)$$

The reversible, favorable, linear, and unfavorable adsorption are respectively denoted by the values  $R_L = 0$ ,  $R_L < 1$ ,  $R_L = 1$ , and  $R_L > 1$ .

## Results and discussion

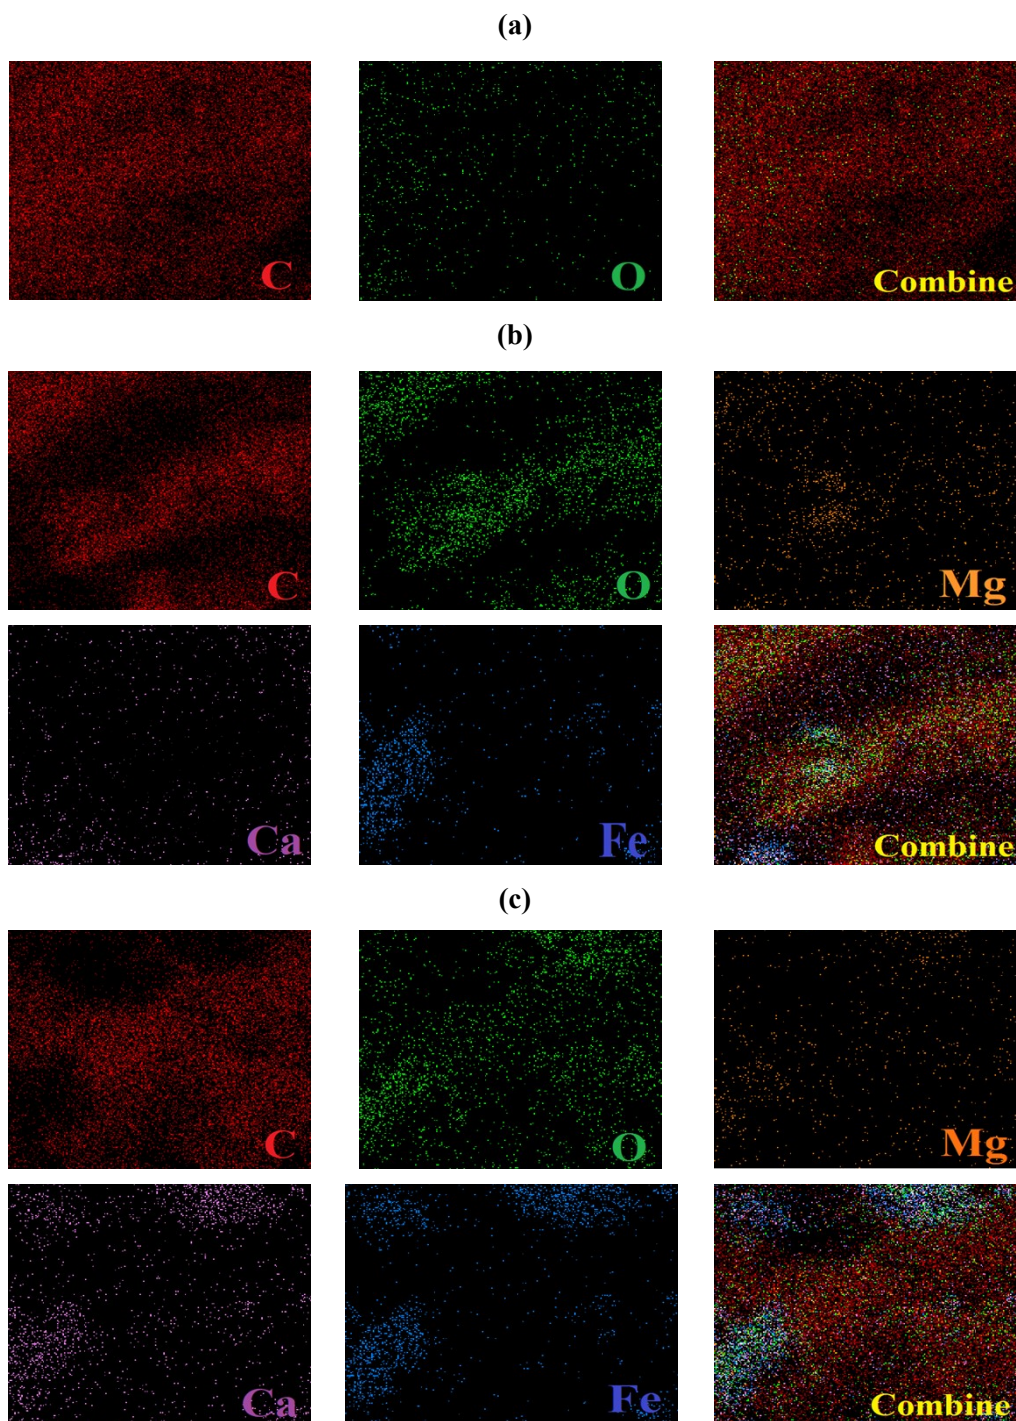

Fig. S2 EDX-Mapping of (a) C<sub>Go</sub>, (b) C<sub>Go</sub>/MCF2, and (c) C<sub>Go</sub>/MCF8.

The morphological features of  $C_G$  and standard graphite were compared by SEM analysis (Fig. S3a-i and b-i). Both samples displayed irregular flake-like morphologies. The particles within these structures range from 0.09 to 0.50  $\mu\text{m}$  in size. The EDX analysis indicated that carbon was the predominant element in both  $C_G$  and standard graphite samples. Meanwhile, the  $C_G$  had slightly higher levels of this element compared to standard graphite. The  $C_G$  and standard graphite had carbon contents of around 81% and 78%, respectively. The elevated carbon content in the  $C_G$  could be due to a great quantity of carbon-rich material presented in the precursor OFP waste. This could impact the ability of  $C_G$  to be used as a valuable starting material for the preparation of  $C_{GO}$ .

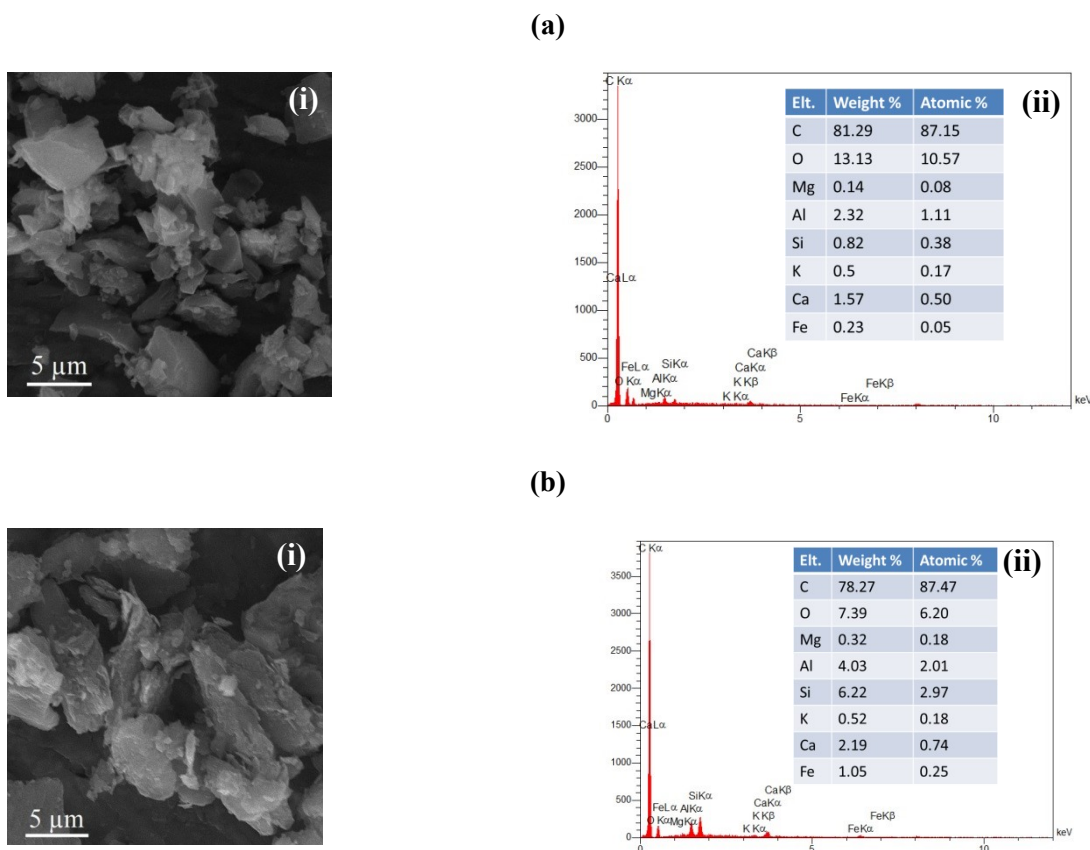

Fig. S3 (i) FESEM images and (ii) EDX semi-quantitative analysis of elements for (a)  $C_G$ , and (b) standard graphite.

Fig. S4 shows N<sub>2</sub> adsorption-desorption isotherms and BJH pore size distribution (inset) of C<sub>G</sub> and standard graphite. Both samples illustrated a typical IV isotherm with H3 hysteresis loops that might be characteristic of the mesoporous structure. Accordingly, the samples exhibited a pore size distribution in the mesoporous range of 2-45 nm (inset, Fig. S4). Table S1 shows the BET surface area, pore average diameter, and pore volume results. From Table S1, the surface area and pore volume of the C<sub>G</sub> sample is lower than standard graphite. While the pore average diameter is obtained to be higher in C<sub>G</sub> as compared to standard graphite. These differences could be attributed to variations in the synthesis process and raw materials used. However, the obtained results are comparable.

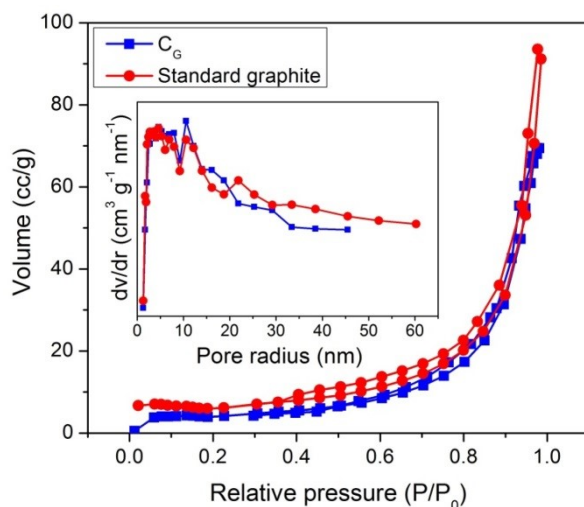

Fig. S4 Adsorption and desorption isotherms and BJH results (inset) for C<sub>G</sub> and standard graphite.

**Table S1** Results of BET and BJH for C<sub>G</sub> and standard graphite.

| Sample                                              | C <sub>G</sub> | Standard graphite |
|-----------------------------------------------------|----------------|-------------------|
| $a_{s, \text{BET}}$ (m <sup>2</sup> /g)             | 14.56          | 24.45             |
| Pore Average Diameter (nm)                          | 29.51          | 23.06             |
| $V_p$ (cm <sup>3</sup> /g) ( $p/p_0 \approx 0.98$ ) | 0.11           | 0.14              |

## References

- 1 A. Valipour, N. Hamnabard and Y. H. Ahn, Performance evaluation of highly conductive graphene (RGOHI–AcOH) and graphene/metal nanoparticle composites (RGO/Ni) coated on carbon cloth for supercapacitor applications, *RSC Adv.*, 2015, **5**, 92970–92979.
- 2 Y. Zohrabi, M. E. Ghazi, M. Izadifard and A. Valipour, Synthesis, structural , magnetic property , and Cd ( II ) adsorption behavior of Ca - substituted  $\text{MgFe}_2\text{O}_4$  nanomaterials in aqueous solutions, *Environ. Sci. Pollut. Res.*, 2024, **31**, 4080-4099.
- 3 M. U. Dao, H. S. Le, H. Y. Hoang, V. A. Tran, V. D. Doan, T. T. N. Le, A. Sirotkin and V. T. Le, Natural core-shell structure activated carbon beads derived from Litsea glutinosa seeds for removal of methylene blue: Facile preparation, characterization, and adsorption properties, *Environ. Res.*, 2021, **198**, 110481.
- 4 C. Prasad, P. K. Murthy, R. H. Krishna, R. S. Rao, V. Suneetha and P. Venkateswarlu, Bio-inspired green synthesis of  $\text{RGO/Fe}_3\text{O}_4$  magnetic nanoparticles using Murrayakoenigii leaves extract and its application for removal of Pb(II) from aqueous solution, *J. Environ. Chem. Eng.*, 2017, **5**, 4374–4380.
